# Supplementary material
Source: publisher site journal article supplement (https://www.dovepress.com/article/383846)
Supplement: Supplementary file 1 [file get_supplementary_file.php]

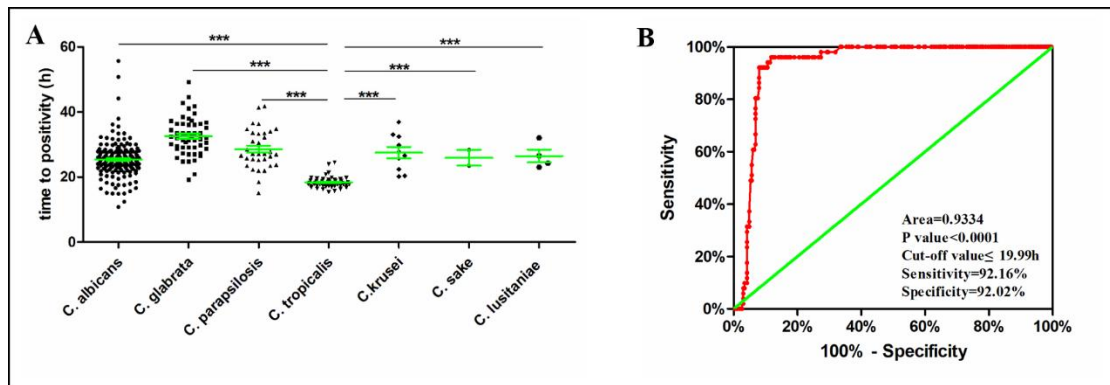

**Figure S1.** A: Scatter plot of time to positivity (TTP) sorted by different *Candida* species used for simulated blood culture, \*\*\*:  $p < 0.001$ . B: Receiver operating characteristic curves proved that TTP is available to distinguish *C. tropicalis* from other *Candida* species in simulated blood culture.

**Table S1** Clinical characteristics of 314 isolates for simulated blood cultures

| Variables                               | <i>C. albicans</i><br>(n=161) | <i>C. parapsilosis</i><br>(n=33) | <i>C. glabrata</i><br>(n=53) | <i>C. tropicalis</i><br>(n=51) | other species<br>(n=16) |
|-----------------------------------------|-------------------------------|----------------------------------|------------------------------|--------------------------------|-------------------------|
| Age, mean ± SD                          | 66.1±15.6                     | 63.3±12.4                        | 68.5±16.6                    | 69.3±10.9                      | 59.6±16.4               |
| Gender (male/female)                    | 93/68                         | 23/10                            | 28/25                        | 30/21                          | 9/7                     |
| Specimen sources, n (%)                 |                               |                                  |                              |                                |                         |
| Respiratory tract                       | 114 (70.81%)                  | 10 (30.30%)                      | 18 (33.96%)                  | 33 (64.71%)                    | 7 (43.75%)              |
| Urine                                   | 38 (23.60%)                   | 8 (24.24%)                       | 22 (41.51%)                  | 7 (13.73%)                     | 2 (12.50%)              |
| Blood                                   | 2 (1.24%)                     | 3 (9.09%)                        | 2 (3.77%)                    | 1 (1.96%)                      | 1 (6.25%)               |
| Hydrothorax                             | 1 (0.62%)                     | 0 (0)                            | 1 (1.89%)                    | 2 (3.92%)                      | 0 (0)                   |
| Ascites                                 | 1 (0.62%)                     | 4 (12.12%)                       | 4 (7.55%)                    | 3 (5.88%)                      | 2 (12.50%)              |
| Abscess                                 | 0 (0)                         | 2 (6.06%)                        | 3 (5.66%)                    | 0 (0)                          | 1 (6.25%)               |
| Skin secretions                         | 4 (2.48%)                     | 5 (15.15%)                       | 1 (1.89%)                    | 5 (9.80%)                      | 2 (12.50%)              |
| Cerebrospinal fluid                     | 1 (0.62%)                     | 1 (3.03%)                        | 0 (0)                        | 0 (0)                          | 1 (6.25%)               |
| Susceptibility to antifungal agents (%) |                               |                                  |                              |                                |                         |
| Amphotericin B                          | 151 (93.79%) <sup>a</sup>     | 33 (100%) <sup>a</sup>           | 50 (94.34%) <sup>a</sup>     | 51 (100%) <sup>a</sup>         |                         |
| 5-fluorocytosine                        | 152 (94.41%)                  | 33 (100%)                        | 53 (100%)                    | 49 (96.08%)                    |                         |
| Fluconazole                             | 143 (88.82%)                  | 27 (81.82%)                      | 39 (73.58%)                  | 43 (84.31%)                    |                         |
| Voriconazole                            | 147 (91.30%)                  | 29 (87.88%)                      | 46 (86.79%) <sup>a</sup>     | 45 (88.24%)                    |                         |

SD: standard deviation; <sup>a</sup>: Epidemiologic cut-off values were applied according to CLSI M59-60<sup>23, 24</sup>

**Table S2** TTPs of different *Candida* species from 314 simulated blood cultures

| Species                | No (%) of positivity | Mean (SD) of TTP | Median (IQR) of TTP |
|------------------------|----------------------|------------------|---------------------|
| <i>C. albicans</i>     | 161 (51.3)           | 25.41 (5.66)     | 25.20 (22.86-27.84) |
| <i>C. glabrata</i>     | 53 (16.9)            | 32.57 (5.77)     | 32.18 (28.98-36.36) |
| <i>C. parapsilosis</i> | 33 (10.5)            | 28.59 (6.13)     | 27.23 (24.48-33.54) |
| <i>C. sake</i>         | 2 (0.6)              | 25.91 (3.47)     | 25.91 (23.45-28.36) |
| <i>C. krusei</i>       | 10 (3.2)             | 27.52 (5.62)     | 27.16 (21.92-32.62) |
| <i>C. lusitaniae</i>   | 4 (1.3)              | 26.47 (3.99)     | 25.40 (23.34-30.67) |
| <i>C. tropicalis</i>   | 51 (16.2)            | 18.32 (1.70)     | 18.17 (17.23-18.91) |

TTP: Time to positivity; SD: standard deviation; IQR: Interquartile Range.

**Table S3** TTPs from *Candida* species with different inoculation amounts

| <i>Candida</i><br>species | TTP (mean $\pm$ SD) |                  |                  | <i>p</i> value |
|---------------------------|---------------------|------------------|------------------|----------------|
|                           | 1000CFU             | 5000CFU          | 25000CFU         |                |
| <i>C. albicans</i>        | 25.88 $\pm$ 0.76    | 24.48 $\pm$ 0.72 | 23.50 $\pm$ 0.52 | 0.06           |
| <i>C. parapsilosis</i>    | 29.04 $\pm$ 2.39    | 27.75 $\pm$ 2.36 | 26.24 $\pm$ 2.44 | 0.72           |
| <i>C. glabrata</i>        | 35.44 $\pm$ 1.97    | 33.61 $\pm$ 2.03 | 32.67 $\pm$ 2.13 | 0.47           |
| <i>C. tropicalis</i>      | 19.33 $\pm$ 0.66    | 18.2 $\pm$ 0.60  | 17.2 $\pm$ 0.56  | 0.11           |

TTP: Time to positivity; SD: standard deviation.

**Table S4** Relationships between TTPs and resistance of *Candida* species to antifungal agents

| Antifungal agents | <i>Candida</i> species              | TTPs mean $\pm$ SD       |                         | <i>p</i> value |
|-------------------|-------------------------------------|--------------------------|-------------------------|----------------|
|                   |                                     | susceptible (n)          | resistant (n)           |                |
| Amphotericin B    | <i>C. albicans</i> <sup>a</sup>     | 25.43 $\pm$ 0.47 (n=151) | 25.06 $\pm$ 1.33 (n=10) | 0.84           |
|                   | <i>C. parapsilosis</i> <sup>a</sup> | 28.59 $\pm$ 1.61 (n=33)  | /                       | /              |
|                   | <i>C. glabrata</i> <sup>a</sup>     | 32.61 $\pm$ 0.82 (n=50)  | 31.80 $\pm$ 0.93 (n=3)  | 0.82           |
|                   | <i>C. tropicalis</i> <sup>a</sup>   | 18.32 $\pm$ 0.47 (n=51)  | /                       | /              |
| 5-fluorocytosine  | <i>C. albicans</i>                  | 25.59 $\pm$ 0.46 (n=152) | 25.27 $\pm$ 1.47 (n=9)  | 0.09           |
|                   | <i>C. parapsilosis</i>              | 28.59 $\pm$ 1.61 (n=33)  | /                       | /              |
|                   | <i>C. glabrata</i>                  | 32.57 $\pm$ 0.79 (n=53)  | /                       | /              |
|                   | <i>C. tropicalis</i>                | 18.31 $\pm$ 0.25 (n=49)  | 18.36 $\pm$ 1.24 (n=2)  | 0.97           |
| Fluconazole       | <i>C. albicans</i>                  | 25.29 $\pm$ 0.47 (n=143) | 26.28 $\pm$ 1.41 (n=18) | 0.49           |
|                   | <i>C. parapsilosis</i>              | 28.31 $\pm$ 1.20 (n=27)  | 29.83 $\pm$ 2.47 (n=6)  | 0.59           |
|                   | <i>C. glabrata</i>                  | 33.15 $\pm$ 0.99 (n=39)  | 30.95 $\pm$ 1.09 (n=14) | 0.24           |
|                   | <i>C. tropicalis</i>                | 18.27 $\pm$ 0.27 (n=43)  | 19.35 $\pm$ 0.86 (n=8)  | 0.14           |
| Voriconazole      | <i>C. albicans</i>                  | 25.35 $\pm$ 0.49 (n=147) | 26.00 $\pm$ 0.66 (n=14) | 0.68           |
|                   | <i>C. parapsilosis</i>              | 28.66 $\pm$ 1.13 (n=29)  | 28.11 $\pm$ 3.65 (n=4)  | 0.87           |
|                   | <i>C. glabrata</i> <sup>a</sup>     | 32.17 $\pm$ 0.82 (n=46)  | 35.15 $\pm$ 2.55 (n=7)  | 0.21           |
|                   | <i>C. tropicalis</i>                | 18.30 $\pm$ 0.23 (n=45)  | 18.45 $\pm$ 1.12 (n=6)  | 0.84           |

TTP: Time to positivity; SD: standard deviation; <sup>a</sup>: Epidemiologic cut-off values were applied according to CLSI M59-60<sup>23, 24</sup>
